# Supplementary material for: A cucurbit[8]uril based supramolecular assembly and its potential applications for the removal of dye and antibiotic from an aqueous medium
Source: Royal Society of Chemistry journal article supplement (doi:10.1039/d4ra00347k), 2024-01-01
Supplement: d4ra00347k1.pdf [file d4ra00347k1.pdf]

**Table S1.** Crystal data and structure refinement for **1**

| Compound                              | <b>1</b>                                                                             |
|---------------------------------------|--------------------------------------------------------------------------------------|
| Empirical formula                     | C <sub>100</sub> H <sub>104</sub> Cl <sub>4</sub> N <sub>60</sub> O <sub>36</sub> Zn |
| Formula weight                        | 2929.60                                                                              |
| Crystal system                        | Tetragonal                                                                           |
| Space group                           | I4 <sub>1</sub> /a                                                                   |
| a (Å)                                 | 28.138(4)                                                                            |
| b (Å)                                 | 28.138(4)                                                                            |
| c (Å)                                 | 21.379(4)                                                                            |
| α (°)                                 | 90                                                                                   |
| β (°)                                 | 90                                                                                   |
| γ (°)                                 | 90                                                                                   |
| V (Å <sup>3</sup> )                   | 16926(5)                                                                             |
| Z                                     | 4                                                                                    |
| D <sub>c</sub> /(g cm <sup>-3</sup> ) | 1.150                                                                                |
| μ/(mm <sup>-1</sup> )                 | 0.287                                                                                |
| F(000)                                | 6040.0                                                                               |
| θ range (°)                           | 3.756-55.194                                                                         |
| R <sub>int</sub>                      | 0.1149                                                                               |
| Parameters                            | 456                                                                                  |
| T (K)                                 | 210.0                                                                                |
| goodness of fit                       | 1.039                                                                                |
| Limiting indices                      | -35 ≤ h ≤ 35<br>-36 ≤ k ≤ 33<br>-27 ≤ l ≤ 27                                         |
| R indices [I > 2σ(I)]                 | R <sub>1</sub> =0.0695, wR <sub>2</sub> =0.2259                                      |
| R indices (all data)                  | R <sub>1</sub> =0.1407, wR <sub>2</sub> =0.2739                                      |
